# Supplementary material
Source: PubMed Central journal article supplement (PMC3370392)
Supplement: NIHMS381656-supplement-Suppl_Tasbles_1_and_2.pdf [file NIHMS381656-supplement-Suppl_Tasbles_1_and_2.pdf]

## Supporting Information

### **Ameloblastin (*Ambn*) upstream region contains structural elements regulating transcriptional activity in a stromal cell line derived from bone marrow**

TAMBURSTUEN MV, SNEAD ML, RESELAND JE, PAINE ML, LYNGSTADAAS SP  
University of Oslo, Norway; and University of Southern California, Los Angeles, CA, USA

**Table S1:** References related to regulatory elements and/or transcription factors.

| Reference ID | Category:                            | References:                                                                                                                                                                                                                                                                                                                                         |
|--------------|--------------------------------------|-----------------------------------------------------------------------------------------------------------------------------------------------------------------------------------------------------------------------------------------------------------------------------------------------------------------------------------------------------|
| A1           | OSE-2                                | DHAMIJA S and KREBSBACH PH. Role of Cbfa1 in ameloblastin gene transcription. <i>J Biol Chem</i> 2001; <b>276</b> : 35159-64.                                                                                                                                                                                                                       |
| A2           | OSE-2                                | DUCY P, ZHANG R, GEOFFROY V, RIDALL AL, AND KARSENTY G. Osf2/Cbfa1: a transcriptional activator of osteoblast differentiation. <i>Cell</i> 1997; <b>89</b> : 747-54.                                                                                                                                                                                |
| A3           | SOX                                  | BRIDGEWATER LC, WALKER MD, MILLER GC, ELLISON TA, HOLSINGER LD, POTTER JL, et al. Adjacent DNA sequences modulate Sox9 transcriptional activation at paired Sox sites in three chondrocyte-specific enhancer elements. <i>Nucleic Acids Research</i> 2003; <b>5</b> : 1541-53                                                                       |
| A4           | MSX                                  | FELEDY JA, MORASSO MI, JANG SI, SARGENT TD. Transcriptional activation by the homeodomain protein distal-less 3. <i>Nucleic Acids Res</i> 1999; <b>3</b> : 764-70                                                                                                                                                                                   |
| A5           | GATA-1                               | GHIRLANDO R, TRAINOR CD. Determinants of GATA-1 binding to DNA - The role of non-finger residues. <i>Journal of Biological Chemistry</i> 2003; <b>46</b> : 45620-8                                                                                                                                                                                  |
| A6           | Shh/Gli1                             | TAKAHASHI S, KAWASHIMA N, SAKAMOTO K, NAKATA A, KAMEDA T, SUGIYAMA T, et al. Differentiation of an ameloblast-lineage cell line (ALC) is induced by Sonic hedgehog signaling. <i>Biochem Biophys Res Commun</i> 2007; <b>2</b> : 405-11                                                                                                             |
| A7           | Gli1                                 | YOON JW, KITA Y, FRANK DJ, MAJEWSKI RR, KONICEK BA, NOBREGA MA, et al. Gene expression profiling leads to identification of GLI1-binding elements in target genes and a role for multiple downstream pathways in GLI1-induced cell transformation. <i>J Biol Chem</i> 2002; <b>7</b> : 5548-55                                                      |
| A8           | OSE-2                                | LEE KS, KIM HJ, LI QL, CHI XZ, UETA C, KOMORI T, et al. Runx2 is a common target of transforming growth factor beta1 and bone morphogenetic protein 2, and cooperation between Runx2 and Smad5 induces osteoblast-specific gene expression in the pluripotent mesenchymal precursor cell line C2C12. <i>Mol Cell Biol</i> 2000; <b>23</b> : 8783-92 |
| A9           | AP-1, TCF-1, CACCC, CF2-II, Krueppel | DHAMIJA S, LIU Y, YAMADA Y, SNEAD ML, KREBSBACH PH. Cloning and characterization of the murine ameloblastin promoter. <i>J Biol Chem</i> 1999; <b>29</b> : 20738-43                                                                                                                                                                                 |

|     |                                              |                                                                                                                                                                                                                                                                                             |
|-----|----------------------------------------------|---------------------------------------------------------------------------------------------------------------------------------------------------------------------------------------------------------------------------------------------------------------------------------------------|
| A10 | Embryonic development/HOX7                   | MACKENZIE A, FERGUSON MW, SHARPE PT. Hox-7 expression during murine craniofacial development. <i>Development</i> 1991; <b>2</b> : 601-11.                                                                                                                                                   |
| A11 | Embryonic development/HOX7                   | MACKENZIE A, LEEMING GL, JOWETT AK, FERGUSON MW, SHARPE PT. The homeobox gene Hox 7.1 has specific regional and temporal expression patterns during early murine craniofacial embryogenesis, especially tooth development in vivo and in vitro. <i>Development</i> 1991; <b>2</b> : 269-85. |
| A12 | Embryonic development/MSX/Shh/Gli3           | LALLEMAND Y, BENSOUSSAN V, CLOMENT CS, ROBERT B. Msx genes are important apoptosis effectors downstream of the Shh/Gli3 pathway in the limb. <i>Dev Biol</i> 2009; <b>2</b> : 189-98.                                                                                                       |
| A13 | Embryonic development/Embryonic Factor 1     | XU J, ZHANG HY, XIE CH, XUE HW, DIJKHUIS P, LIU CM. EMBRYONIC FACTOR 1 encodes an AMP deaminase and is essential for the zygote to embryo transition in Arabidopsis. <i>Plant J</i> 2005; <b>5</b> : 743-56.                                                                                |
| A14 | Embryonic development/NKX2-5/GATA4           | RIAZI AM, TAKEUCHI JK, HORNBERGER LK, ZAIDI SH, AMINI F, COLES J, et al. NKX2-5 regulates the expression of beta-catenin and GATA4 in ventricular myocytes. <i>PLoS One</i> 2009; <b>5</b> : e5698.                                                                                         |
| A15 | Embryonic development/MEF2C                  | VERZI MP, AGARWAL P, BROWN C, MCCULLEY DJ, SCHWARZ JJ, BLACK BL. The transcription factor MEF2C is required for craniofacial development. <i>Dev Cell</i> 2007; <b>4</b> : 645-52.                                                                                                          |
| A16 | Embryonic development/osteogenesis Gli3/PLZF | BARNA M, PANDOLFI PP, NISWANDER L. Gli3 and Plzf cooperate in proximal limb patterning at early stages of limb development. <i>Nature</i> 2005; <b>7048</b> : 277-81.                                                                                                                       |
| A17 | Embryonic development/OG-2/NOBOX             | SUZUMORI N, YAN C, MATZUK MM, RAJKOVIC A. Nobox is a homeobox-encoding gene preferentially expressed in primordial and growing oocytes. <i>Mech Dev</i> 2002; <b>1-2</b> : 137-41.                                                                                                          |
| A18 | Embryonic development/osteogenesis/AJ18      | JHEON A, CHEN J, TEO W, GANSS B, SODEK J, CHEIFETZ S. Temporal and spatial expression of a novel zinc finger transcription factor, AJ18, in developing murine skeletal tissues. <i>J Histochem Cytochem</i> 2002; <b>7</b> : 973-82.                                                        |
| A19 | Embryonic development                        | HOROWITZ MC, LORENZO JA. B lymphocytes and the skeleton. <i>Ann N Y Acad Sci</i> 2007; <b>1117</b> : 82-93                                                                                                                                                                                  |
| A20 | Review Embryonic development/HOX             | WELLIK DM. Hox genes and vertebrate axial pattern. <i>Curr Top Dev Biol</i> 2009; <b>88</b> : 257-78                                                                                                                                                                                        |
| A21 | Review Embryonic development/PAX             | CHI N, EPSTEIN JA. Getting your Pax straight: Pax proteins in development and disease. <i>Trends Genet</i> 2002; <b>1</b> : 41-7                                                                                                                                                            |
| A22 | Review Embryonic development/PAX             | WANG Q, FANG WH, KRUPINSKI J, KUMAR S, SLEVIN M, KUMAR P. Pax genes in embryogenesis and oncogenesis. <i>J Cell Mol Med</i> 2008; <b>6A</b> : 2281-94                                                                                                                                       |
| A23 | Review Embryonic development/MEF2            | POTTHOFF MJ, OLSON EN. MEF2: a central regulator of diverse developmental programs. <i>Development</i> 2007; <b>23</b> : 4131-40                                                                                                                                                            |
| A24 | Review Embryonic development                 | REMENYI A, SCHOLER HR, WILMANN M. Combinatorial control of gene expression. <i>Nat Struct Mol Biol</i> 2004; <b>9</b> : 812-5                                                                                                                                                               |
| A25 | Review Embryonic development                 | ALCALAY NI, VANDEN HEUVEL GB. Regulation of cell proliferation and differentiation in the kidney. <i>Front Biosci</i> 2009; <b>14</b> : 4978-91                                                                                                                                             |
| A26 | Embryonic development/HOX/CDX                | YOUNG T, DESCHAMPS J. Hox, Cdx, and anteroposterior patterning in the mouse embryo. <i>Curr Top Dev Biol</i> 2009; <b>88</b> : 235-55                                                                                                                                                       |
| B1  | Osteogenesis/YY1                             | SHI Z, SILVEIRA A, PATEL P, FENG X. YY1 is involved in RANKL-induced transcription of the tartrate-resistant acid phosphatase gene in osteoclast differentiation. <i>Gene</i> 2004; <b>1</b> : 117-26                                                                                       |
| B2  | Osteogenesis/BCL6                            | YU RY, WANG X, PIXLEY FJ, YU JJ, DENT AL, BROXMEYER HE, et al. BCL-6 negatively regulates macrophage proliferation by suppressing autocrine IL-6 production. <i>Blood</i> 2005; <b>4</b> : 1777-84                                                                                          |
| B3  | Osteogenesis/MEF2C                           | ARNOLD MA, KIM Y, CZUBRYT MP, PHAN D, MCANALLY J, QI X, et al. MEF2C transcription factor controls chondrocyte hypertrophy and bone development. <i>Dev Cell</i> 2007; <b>3</b> : 377-89                                                                                                    |

|     |                                                              |                                                                                                                                                                                                                                                                                                                                                                              |
|-----|--------------------------------------------------------------|------------------------------------------------------------------------------------------------------------------------------------------------------------------------------------------------------------------------------------------------------------------------------------------------------------------------------------------------------------------------------|
| B4  | Osteogenesis/<br>MEF2C                                       | STEHLING-SUN S, DADE J, NUTT SL, DEKOTER RP, CAMARGO FD. Regulation of lymphoid versus myeloid fate 'choice' by the transcription factor Mef2c. <i>Nat Immunol</i> 2009; <b>3</b> : 289-96                                                                                                                                                                                   |
| B5  | Osteogenesis/<br>LEF-1                                       | KAHLER RA, WESTENDORF JJ. Lymphoid enhancer factor-1 and beta-catenin inhibit Runx2-dependent transcriptional activation of the osteocalcin promoter. <i>J Biol Chem</i> 2003; <b>14</b> : 11937-44                                                                                                                                                                          |
| B6  | Osteogenesis/<br>PLZF                                        | INOUE I, IKEDA R, TSUKAHARA S. Current topics in pharmacological research on bone metabolism: Promyelotic leukemia zinc finger (PLZF) and tumor necrosis factor-alpha-stimulated gene 6 (TSG-6) identified by gene expression analysis play roles in the pathogenesis of ossification of the posterior longitudinal ligament. <i>J Pharmacol Sci</i> 2006; <b>3</b> : 205-10 |
| B7  | Osteogenesis/<br>PAX5                                        | HOROWITZ MC, XI Y, PFLUGH DL, HESSLEIN DG, SCHATZ DG, LORENZO JA, et al. Pax5-deficient mice exhibit early onset osteopenia with increased osteoclast progenitors. <i>J Immunol</i> 2004; <b>11</b> : 6583-91                                                                                                                                                                |
| B8  | Osteogenesis/<br>GATA-1                                      | KACENA MA, SHIVDASANI RA, WILSON K, XI Y, TROIANO N, NAZARIAN A, et al. Megakaryocyte-osteoblast interaction revealed in mice deficient in transcription factors GATA-1 and NF-E2. <i>J Bone Miner Res</i> 2004; <b>4</b> : 652-60                                                                                                                                           |
| B9  | Review/<br>Osteogenesis                                      | EZOE S, MATSUMURA I, SATOH Y, TANAKA H, KANAKURA Y. Cell cycle regulation in hematopoietic stem/progenitor cells. <i>Cell Cycle</i> 2004; <b>3</b> : 314-8                                                                                                                                                                                                                   |
| B10 | Review/<br>Osteogenesis                                      | KAWAI M, DEVLIN MJ, ROSEN CJ. Fat targets for skeletal health. <i>Nat Rev Rheumatol</i> 2009; <b>7</b> : 365-72                                                                                                                                                                                                                                                              |
| B11 | Review/<br>Osteogenesis                                      | TAKADA I, KOUZMENKO AP, KATO S. Molecular switching of osteoblastogenesis versus adipogenesis: implications for targeted therapies. <i>Expert Opin Ther Targets</i> 2009; <b>5</b> : 593-603                                                                                                                                                                                 |
| B12 | Review/<br>Osteogenesis                                      | HOROWITZ MC, LORENZO JA. The origins of osteoclasts. <i>Curr Opin Rheumatol</i> 2004; <b>4</b> : 464-8                                                                                                                                                                                                                                                                       |
| C1  | Cell cycle control and differentiation of bone related cells | YU RY, WANG X, PIXLEY FJ, YU JJ, DENT AL, BROXMEYER HE, et al. BCL-6 negatively regulates macrophage proliferation by suppressing autocrine IL-6 production. <i>Blood</i> 2005; <b>4</b> : 1777-84                                                                                                                                                                           |
| C2  | Cell cycle control and differentiation of bone related cells | KACENA MA, SHIVDASANI RA, WILSON K, XI Y, TROIANO N, NAZARIAN A, et al. Megakaryocyte-osteoblast interaction revealed in mice deficient in transcription factors GATA-1 and NF-E2. <i>J Bone Miner Res</i> 2004; <b>4</b> : 652-60                                                                                                                                           |
| C3  | Cell cycle control and differentiation of bone related cells | EZOE S, MATSUMURA I, SATOH Y, TANAKA H, KANAKURA Y. Cell cycle regulation in hematopoietic stem/progenitor cells. <i>Cell Cycle</i> 2004; <b>3</b> : 314-8                                                                                                                                                                                                                   |
| C4  | Cell cycle control and differentiation of bone related cells | JHEON AH, SUZUKI N, NISHIYAMA T, CHEIFETZ S, SODEK J, GANSS B. Characterization of the 5'-flanking region of the rat AJ18 gene. <i>Gene</i> 2003; <b>310</b> : 203-13                                                                                                                                                                                                        |
| C5  | Cell cycle control and differentiation of bone related cells | IKEDA R, YOSHIDA K, TSUKAHARA S, SAKAMOTO Y, TANAKA H, FURUKAWA K, et al. The promyelotic leukemia zinc finger promotes osteoblastic differentiation of human mesenchymal stem cells as an upstream regulator of CBFA1. <i>J Biol Chem</i> 2005; <b>9</b> : 8523-30                                                                                                          |
| C6  | Cell cycle control and differentiation of bone related cells | KAHLER RA, GALINDO M, LIAN J, STEIN GS, VAN WIJNEN AJ, WESTENDORF JJ. Lymphocyte enhancer-binding factor 1 (Lef1) inhibits terminal differentiation of osteoblasts. <i>J Cell Biochem</i> 2006; <b>5</b> : 969-83                                                                                                                                                            |
| C7  | Cell cycle control and differentiation of bone related cells | WAN Y, CHONG LW, EVANS RM. PPAR-gamma regulates osteoclastogenesis in mice. <i>Nat Med</i> 2007; <b>12</b> : 1496-503                                                                                                                                                                                                                                                        |
| C8  | Cell cycle control and differentiation of bone related cells | SYVERSEN U, STUNES AK, GUSTAFSSON BI, OBRANT KJ, NORDSLETTEN L, BERGE R, et al. Different skeletal effects of the peroxisome proliferator activated receptor (PPAR)alpha agonist fenofibrate and the PPARgamma agonist pioglitazone. <i>BMC Endocr Disord</i> 2009; <b>9</b> : 10                                                                                            |
| C9  | Cell cycle control and differentiation of bone related cells | JHEON A, BANSAL AK, ZHU B, GANSS B, CHEIFETZ S, SODEK J. Characterisation of the constitutive over-expression of AJ18 in a novel rat stromal bone marrow cell line (D8-SBMC). <i>Arch Oral Biol</i> 2009; <b>8</b> : 705-16                                                                                                                                                  |

|     |                                                                     |                                                                                                                                                                                                                                                                                                |
|-----|---------------------------------------------------------------------|------------------------------------------------------------------------------------------------------------------------------------------------------------------------------------------------------------------------------------------------------------------------------------------------|
| C10 | Review/Cell cycle control and differentiation of bone related cells | YOUNG T, DESCHAMPS J. Hox, Cdx, and anteroposterior patterning in the mouse embryo. <i>Curr Top Dev Biol</i> 2009; <b>88</b> : 235-55                                                                                                                                                          |
| C11 | Review/Cell cycle control and differentiation of bone related cells | CAROTTA S, NUTT SL. Losing B cell identity. <i>Bioessays</i> 2008; <b>3</b> : 203-7                                                                                                                                                                                                            |
| D1  | Bone metabolism/ Shh/Gli                                            | ZHAO M, QIAO M, HARRIS SE, CHEN D, OYAJOBIBO, MUNDY GR. The zinc finger transcription factor Gli2 mediates bone morphogenetic protein 2 expression in osteoblasts in response to hedgehog signaling. <i>Mol Cell Biol</i> 2006; <b>16</b> : 6197-208                                           |
| D2  | Bone metabolism/ Shh/Gli                                            | JAMES MJ, JARVINEN E, WANG XP, THESLEFF I. Different roles of Runx2 during early neural crest-derived bone and tooth development. <i>Journal of Bone and Mineral Research</i> 2006; <b>7</b> : 1034-44                                                                                         |
| D3  | Bone metabolism/ Shh/Gli                                            | QI HL, AGUIAR DJ, WILLIAMS SM, LA PEAN A, PAN W, VERFAILLIE CM. Identification of genes responsible for osteoblast differentiation from human mesodermal progenitor cells. <i>Proceedings of the National Academy of Sciences of the United States of America</i> 2003; <b>6</b> : 3305-10     |
| D4  | Bone metabolism                                                     | HILL TP, SPATER D, TAKETO MM, BIRCHMEIER W, HARTMANN C. Canonical Wnt/beta-catenin signaling prevents osteoblasts from differentiating into chondrocytes. <i>Dev Cell</i> 2005; <b>5</b> : 727-38                                                                                              |
| D5  | Bone metabolism                                                     | FUKUMOTO S, KIBA T, HALL B, IEHARA N, NAKAMURA T, LONGENECKER G, et al. Ameloblastin is a cell adhesion molecule required for maintaining the differentiation state of ameloblasts. <i>J Cell Biol</i> 2004; <b>5</b> : 973-83                                                                 |
| D6  | Bone metabolism                                                     | YOON JW, KITA Y, FRANK DJ, MAJEWSKI RR, KONICEK BA, NOBREGA MA, et al. Gene expression profiling leads to identification of GLI1-binding elements in target genes and a role for multiple downstream pathways in GLI1-induced cell transformation. <i>J Biol Chem</i> 2002; <b>7</b> : 5548-55 |
| D7  | Bone metabolism                                                     | WATSON RP, TEKKE-KESSARIS N, BOULTER CA. Characterisation, chromosomal localisation and expression of the mouse Kid3 gene. <i>Biochim Biophys Acta</i> 2000; <b>1-2</b> : 153-8                                                                                                                |
| D8  | Bone metabolism                                                     | KAWASHIMA N, SHINDO K, SAKAMOTO K, KONDO H, UMEZAWA A, KASUGAI S, et al. Molecular and cell biological properties of mouse osteogenic mesenchymal progenitor cells, Kusa. <i>J Bone Miner Metab</i> 2005; <b>2</b> : 123-33                                                                    |
| D9  | Bone metabolism                                                     | MCMAHON AP, INGHAM PW, TABIN CJ. Developmental roles and clinical significance of hedgehog signaling. <i>Curr Top Dev Biol</i> 2003; <b>53</b> : 1-114                                                                                                                                         |
| D10 | Bone metabolism                                                     | IWASAKI M, LE AX, HELMS JA. Expression of indian hedgehog, bone morphogenetic protein 6 and gli during skeletal morphogenesis. <i>Mech Dev</i> 1997; <b>1-2</b> : 197-202                                                                                                                      |
| D11 | Bone metabolism                                                     | JHEON AH, GANSS B, CHEIFETZ S, SODEK J. Characterization of a novel KRAB/C2H2 zinc finger transcription factor involved in bone development. <i>J Biol Chem</i> 2001; <b>21</b> : 18282-9                                                                                                      |
| D12 | Bone metabolism                                                     | KARSENTY G. Transcriptional control of skeletogenesis. <i>Annu Rev Genomics Hum Genet</i> 2008; <b>9</b> : 183-96                                                                                                                                                                              |
| E1  | SOX                                                                 | HARLEY VR, LOVELL-BADGE R, GOODFELLOW PN. Definition of a consensus DNA binding site for SRY. <i>Nucleic Acids Res</i> 1994; <b>8</b> : 1500-1                                                                                                                                                 |
| E2  | SOX                                                                 | WEGNER M. All purpose Sox: The many roles of Sox proteins in gene expression. <i>Int J Biochem Cell Biol</i> 2010; <b>3</b> : 381-90                                                                                                                                                           |
| F1  | PPAR                                                                | LEMBERGER T, BRAISSANT O, JUGE-AUBRY C, KELLER H, SALADIN R, STAELS B, et al. PPAR tissue distribution and interactions with other hormone-signaling pathways. <i>Ann N Y Acad Sci</i> 1996; <b>804</b> : 231-51                                                                               |
| F2  | PPAR                                                                | ISSEMANN I, GREEN S. Activation of a member of the steroid hormone receptor superfamily by peroxisome proliferators. <i>Nature</i> 1990; <b>6294</b> : 645-50                                                                                                                                  |
| F3  | PPAR                                                                | TAKADA I, KOUZMENKO AP, KATO S. Wnt and PPARgamma signaling in osteoblastogenesis and adipogenesis. <i>Nat Rev Rheumatol</i> 2009; <b>8</b> : 442-7                                                                                                                                            |

**Table S2:** Localization of potential cis regulatory sequences according to transcription start site. Nucleotide sequence and score hit are indicated.

| <b>Gene name:</b> | <b>Protein name:<br/>Sequence</b>                                                            | <b>Position</b> | <b>+/-<br/>Strand</b> | <b>Score<br/>hit</b> |
|-------------------|----------------------------------------------------------------------------------------------|-----------------|-----------------------|----------------------|
| RFX1 1)           | MHC classII regulatory factor RFX1<br>GTGGGGCTCAAGGAACTC                                     | -3787           | (+)                   | 0.982                |
| RFX1 2)           | AAGATACTAAGGAAACAA                                                                           | -3737           | (+)                   | 0.982                |
| Pax-5             | Paired box protein<br>CTGATGGCGTTCCAGCACTGAGAAGGGA                                           | -3652           | (-)                   | 1.000                |
| OSE2              | Osteoblast Specific Element 2<br>AACCTC                                                      | -3614           | (+)                   | manual               |
| OSE2              | Osteoblast Specific Element 2<br>CTCCAA                                                      | -3587           | (+)                   | manual               |
| MEF2              | Myocyte-specific enhancer factor 2<br>CAAATCCCTTAAAATAGGCCCC                                 | -3523           | (+)                   | 1.000                |
| Sox               | SRY-related HMG boxes<br>(A/T)AACAA(T/A)                                                     | -3475           | (+)                   | manual               |
| Sox               | SRY-related HMG boxes<br>(A/T)AACAA(T/A)                                                     | -3468           | (+)                   | manual               |
| Pax-4             | Paired box protein<br>GGGGTTGAAGAGTGACTCACAATAATTTGG                                         | -3455           | (-)                   | 0.823                |
| Pax-8             | Paired box protein<br>GGTTGAAGAGTGACT                                                        | -3453           | (+)                   | 0.973                |
| MAF               | V-maf musculoaponeurotic fibrosarcoma oncogene<br>Homolog<br>GTGACTCACAA                     | -3444           | (-)                   | 1.000                |
| Octamer           | NONO = Non POU-Domain-containing octamer binding<br>Protein<br>TTATTTACATT                   | -3407           | (+)                   | 0.966                |
| FAC1              | Embryonic Factor 1 (human): Bromodomain PHD finger<br>transcription factor<br>TATTTGTTTTGTCC | -3305           | (-)                   | 0.978                |
| HNF3alpha         | Hepatocyte Nuclear Factor 3<br>TATTTGTTTTG                                                   | -3305           | (+)                   | 0.978                |
| HNF3LPH           | Hepatocyte Nuclear Factor 3<br>TGTTTGTTTTA                                                   | -3250           | (+)                   | 1.000                |
| Sox               | SRY-related HMG boxes<br>(A/T)AACAA(T/A)                                                     | -3241           | (+)                   | manual               |
| Octamer           | NONO = Non POU-Domain-containing octamer binding<br>Protein<br>GGATTTGCATT                   | -3223           | (+)                   | 1.000                |
| CDP               | CCAT Displacement Protein = Cux1<br>TGCATTGATCAGGAA                                          | -3218           | (+)                   | 0.930                |
| Tel-2             | Telomere length regulation protein TEL2 homolog<br>CAGGAAGTAG                                | -3209           | (-)                   | 1.000                |

|                                              |                                                                                                                                                   |       |     |        |
|----------------------------------------------|---------------------------------------------------------------------------------------------------------------------------------------------------|-------|-----|--------|
| ISGF-3                                       | Signal transducer and activator of transcription 1-alpha/<br>beta (Transcription factor ISGF-3 components p91/p84)<br>= STAT-1<br>GAGAAAGGGAAACTG | -3179 | (-) | 1.000  |
| PLZF                                         | Promyelocytic leukemia zinc finger<br>AATCTATTTTCAATTTAAAAGAAATCAAA                                                                               | -3139 | (-) | 0.979  |
| FAC1                                         | Embryonic Factor 1 (human): Bromodomain PHD finger<br>transcription factor<br>TAAAACAACACACA                                                      | -3087 | (+) | 1.000  |
| CdxA                                         | CDX1 is a caudal-type homeobox intestine-specific<br>transcription factor<br>ATTTATA                                                              | -3034 | (+) | 1.000  |
| OSE2                                         | Osteoblast Specific Element 2<br>ACCCAC                                                                                                           | -3018 | (+) | manual |
| IPF1                                         | Insulin Promoter Factor<br>Synonym Pdx1Pancreatic Duedenal homeobox 1<br>GACTTAATGATT                                                             | -2982 | (+) | 1.000  |
| Hand:E47                                     | E12/E47 basic helix-loophelix transcription factor<br>(the E2A gene product)<br>CAAGAAGTCTGGAAAA                                                  | -2965 | (+) | 1.000  |
| Pax-4                                        | Paired box protein<br>GAAAAACAAGAATTAACCCAAATCACTAT                                                                                               | -2954 | (+) | 0.943  |
| YY1                                          | Yin and Yang 1 (synonym NMP1)<br>AAACATGGC                                                                                                        | -2905 | (-) | 1.000  |
| IPF1                                         | Insulin Promoter Factor<br>Synonym Pdx1Pancreatic Duedenal homeobox 1<br>AAATTAATGAAT                                                             | -2894 | (+) | 1.000  |
| CDP CR3                                      | CCAT Displacement Protein = Cux1<br>CAATAAATCTAAGAG                                                                                               | -2858 | (-) | 0.996  |
| PPAR $\gamma$ :RXR $\gamma$<br>PPAR $\alpha$ | Peroxisome proliferator-activated receptor gamma<br>RXR $\alpha$ Retinoic acid receptor alpha<br>AAAAATGCAAGATTGACCAATTC                          | -2829 | (-) | 1.000  |
| OG-2                                         | Nobox OG-2 Homeobox protein NOBOX<br>CAATTA                                                                                                       | -2760 | (-) | 1.000  |
| OSE2                                         | Osteoblast Specific Element 2<br>CACCAA                                                                                                           | -2726 | (+) | manual |
| Pax-4                                        | Paired box protein<br>AAAAATTCTCCACCTGGAAATATACACACA                                                                                              | -2685 | (+) | 1.000  |
| Kid-3                                        | Kidney, ischemia, and developmentally-regulated<br>protein 3 = Zinc finger protein 354c and AJ18<br>CCACC                                         | -2676 | (+) | 1.000  |
| BCL6                                         | B-cell lymphoma 6 proteinhomolog<br>ACCTGGAAAT                                                                                                    | -2674 | (-) | 0.985  |
| PPAR $\alpha$ :RXR $\alpha$                  | Peroxisome proliferator-activated receptor alpha<br>RXR $\alpha$ Retinoic acid receptor alpha<br>ACTGAGAAGGTTATAGTTAA                             | -2640 | (+) | 0.789  |
| POU3F2                                       | POU domain, class 3, transcription factor 2<br>ATGAACATAT                                                                                         | -2576 | (-) | 0.891  |
| Sox                                          | SRY-related HMG boxes<br>(A/T)AACAA(T/A)                                                                                                          | -2555 | (+) | manual |

|                                              |                                                                                                                          |       |     |        |
|----------------------------------------------|--------------------------------------------------------------------------------------------------------------------------|-------|-----|--------|
| PPAR $\alpha$ :RXR $\alpha$                  | Peroxisome proliferator-activated receptor alpha<br>RXR $\alpha$ Retinoic acid receptor alpha<br>TATCAAAGGCCAAATGTCT     | -2468 | (+) | 0.751  |
| Sox                                          | SRY-related HMG boxes<br>(A/T)AACAA(T/A)                                                                                 | -2466 | (+) | manual |
| HOXA7                                        | Homeobox proteoin Hox-A7<br>AGATTGG                                                                                      | -2423 | (-) | 1.000  |
| Kid-3                                        | Kidney, ischemia, and developmentally-regulated<br>protein 3 = Zinc finger protein 354c and AJ18<br>GGTGG                | -2418 | (-) | 1.000  |
| Pax-6                                        | Paired box protein<br>GAGCTCCAGGCCAG                                                                                     | -2407 | (-) | 0.854  |
| PPAR $\gamma$ :RXR $\alpha$<br>PPAR $\gamma$ | Peroxisome proliferator-activated receptor gamma<br>RXR $\alpha$ Retinoic acid receptor alpha<br>CTCCAGGCCAGCCTCATCTACAT | -2404 | (+) | 0.832  |
| PPAR $\gamma$ :RXR $\alpha$<br>PPAR $\gamma$ | Peroxisome proliferator-activated receptor gamma<br>RXR $\alpha$ Retinoic acid receptor alpha<br>CTCCAGGCCAGCCTCATCTACAT | -2404 | (-) | 0.686  |
| Pax-4                                        | Paired box protein<br>GAAAAATGTCGCCTTTAATCCCGGCACTCA                                                                     | -2361 | (+) | 0.943  |
| Muscle initiator<br>sequences 19             | TAATCCCGGCACTCAGGAGGC                                                                                                    | -2346 | (+) | 0.998  |
| Pax-6                                        | Paired box protein<br>GAGTTCCAGGACAA                                                                                     | -2278 | (-) | 1.000  |
| PPAR $\gamma$ :RXR $\alpha$<br>PPAR $\gamma$ | Peroxisome proliferator-activated receptor gamma<br>RXR $\alpha$ Retinoic acid receptor alpha<br>TTTGAGGCCAGCCTGATCGACAA | -2304 | (-) | 0.787  |
| BCL6                                         | B-cell lymphoma 6 proteinhomolog<br>AGTTCCAGGA                                                                           | -2277 | (+) | 0.980  |
| PLZF                                         | Promylocytic leukemia zinc finger<br>GTATTCAGCTTCCTTTACCATCAAGAAAA                                                       | -2149 | (-) | 1.000  |
| Cart-1                                       | Cartilage homeoprotein 1 = ALX 1<br>AGAAAATGAAAATTAATAA                                                                  | -2126 | (-) | 1.000  |
| LEF1,TCF1                                    | Lymphoid enhancer-binding factor 1<br>T-cell-specific transcription factor 1<br>GAGATCAAAGC                              | -2101 | (-) | 1.000  |
| Sox                                          | SRY-related HMG boxes<br>(A/T)AACAA(T/A)                                                                                 | -2098 | (+) | manual |
| MYB                                          | Myb proto-oncogene protein<br>TAACTGACAGT                                                                                | -2088 | (-) | 1.000  |
| Tel-2                                        | Telomere length regulation protein TEL2 homolog<br>CAGGAAGTAG                                                            | -2068 | (-) | 1.000  |
| PPAR $\gamma$ :RXR $\alpha$<br>PPAR $\gamma$ | Peroxisome proliferator-activated receptor gamma<br>RXR $\alpha$ Retinoic acid receptor alpha<br>GCCTTGGTCACTTTTGCTAAGAT | -2047 | (+) | 1.000  |
| BCL6                                         | B-cell lymphoma 6 proteinhomolog<br>TCCTTGAAAT                                                                           | -1985 | (-) | 0.980  |

|                                              |                                                                                                                          |       |     |        |
|----------------------------------------------|--------------------------------------------------------------------------------------------------------------------------|-------|-----|--------|
| MEF-2                                        | Myocyte-specific enhancer factor 2<br>TTGAAATCTTAAAATAGATCAT                                                             | -1982 | (+) | 1.000  |
| CDP                                          | CCAT Displacement Protein = Cux1<br>AAAATAGATCATAGG                                                                      | -1972 | (+) | 0.912  |
| GATA-1                                       | GATA binding Factor 1<br>AGATAA                                                                                          | -1905 | (+) | manual |
| OG-2                                         | Nobox OG-2 Homebox protein NOBOX<br>TAATTG                                                                               | -1902 | (+) | 1.000  |
| Nkx2-5                                       | Homebox protein Nkx-2.5<br>TGCCACTTTA                                                                                    | -1891 | (+) | 1.000  |
| POU3F2                                       | POU domain, class 3, transcription factor 2<br>ATTTACATAA                                                                | -1810 | (-) | 1.000  |
| OSE2                                         | Osteoblast Specific Element 2<br>AACCAC                                                                                  | -1597 | (+) | manual |
| PPAR $\gamma$ :RXR $\alpha$<br>PPAR $\gamma$ | Peroxisome proliferator-activated receptor gamma<br>RXR $\alpha$ Retinoic acid receptor alpha<br>AAGGAGGACAGCAAGACACAGGT | -1567 | (+) | 0.832  |
| Nkx2-5                                       | Homebox protein Nkx-2.5<br>TCAAGTGACT                                                                                    | -1540 | (-) | 1.000  |
| Oct-1                                        | Pou2f1 POU-Domain Class 2<br>AATGTAATCACAA                                                                               | -1510 | (+) | 1.000  |
| Kid-3                                        | Kidney, ischemia, and developmentally-regulated<br>protein 3 = Zinc finger protein 354c and AJ18<br>GGTGG                | -1380 | (-) | 1.000  |
| Kid-3                                        | Kidney, ischemia, and developmentally-regulated<br>protein 3 = Zinc finger protein 354c and AJ18<br>GGTGG                | -1377 | (-) | 1.000  |
| Kid-3                                        | Kidney, ischemia, and developmentally-regulated<br>protein 3 = Zinc finger protein 354c and AJ18<br>GGTGG                | -1374 | (-) | 1.000  |
| Kid-3                                        | Kidney, ischemia, and developmentally-regulated<br>protein 3 = Zinc finger protein 354c and AJ18<br>GGTGG                | -1371 | (-) | 1.000  |
| Kid-3                                        | Kidney, ischemia, and developmentally-regulated<br>protein 3 = Zinc finger protein 354c and AJ18<br>GGTGG                | -1367 | (-) | 1.000  |
| Kid-3                                        | Kidney, ischemia, and developmentally-regulated<br>protein 3 = Zinc finger protein 354c and AJ18<br>GGTGG                | -1365 | (-) | 1.000  |
| HNF3alpha                                    | Hepatocyte Nuclear Factor 3<br>TGTTTGTTTT                                                                                | -1356 | (+) | 1.000  |
| BRCA1:USF2                                   | Breast cancer type 1 susceptibility protein homolog<br>CAACCAA                                                           | -1236 | (-) | 0.997  |
| PEBP                                         | Polyoma Enhancer Binding Protein 2<br>AAGTATGTGGTGATG                                                                    | -1230 | (-) | 1.000  |
| C/EBPalpha                                   | CCAAT enhancer binding protein alpha/gamma homolog<br>GTCTTCAGCAATTC                                                     | -1216 | (-) | 1.000  |
| IPF1                                         | Insulin Promoter Factor<br>Synonym Pdx1Pancreatic Duodenal homebox 1<br>GAAATAATGGCA                                     | -1175 | (+) | 1.000  |

|                                              |                                                                                                                          |       |     |        |
|----------------------------------------------|--------------------------------------------------------------------------------------------------------------------------|-------|-----|--------|
| C/EBP $\gamma$                               | Leucine zipper transaction factor (chicken)<br>CTTCTTAAATAAC                                                             | -1057 | (-) | 0.907  |
| PPAR $\gamma$ :RXR $\alpha$<br>PPAR $\gamma$ | Peroxisome proliferator-activated receptor gamma<br>RXR $\alpha$ Retinoic acid receptor alpha<br>ATGAAGGTGTCTTTCTCCCAAAA | -1012 | (-) | 0.732  |
| Msx                                          | Homeobox protein MSX-1 (Msh homeobox 1-like protein)<br>(Hox-7) (Hox-7.1)<br>ATAATTG(G/C)                                | -966  | (+) | manual |
| OG-2                                         | Nobox OG-2 Homeobox protein NOBOX<br>TAATTG                                                                              | -965  | (+) | 1.000  |
| MAF                                          | V-maf musculoaponeurotic fibrosarcoma oncogene<br>homolog (avian)<br>TACTGAGTCAT                                         | -932  | (+) | 1.000  |
| AP-1                                         | Transcription factor AP-1, Activator protein 1,<br>Proto-oncogene c-jun, Gene name: Jun<br>TGAGTCAT                      | -929  | (+) | 1.000  |
| PPAR $\alpha$ :RXR $\alpha$                  | Peroxisome proliferator-activated receptor alpha<br>RXR $\alpha$ Retinoic acid receptor alpha<br>GACGTAGAGGGCAGAGGTAC    | -862  | (+) | 0.899  |
| GATA-X                                       | GATA Binding Factor 1<br>Erythroid transcription factor<br>CGCTCTTATCT                                                   | -825  | (-) | 1.000  |
| HNF4                                         | Hepatocyte nuclear factor 4<br>GGAGCAAAGCCCAG                                                                            | -808  | (+) | 1.000  |
| YY1                                          | Yin and Yang 1 (synonym NMP1)<br>CCAGCCATGTT                                                                             | -798  | (+) | 1.000  |
| YY1                                          | Yin and Yang 1 (synonym NMP1)<br>GCCATGTTG                                                                               | -795  | (+) | 1.000  |
| CdxA                                         | CDX1 is a caudal-type homeobox intestine-specific<br>transcription factor<br>TATTAAT                                     | -754  | (-) | 1.000  |
| Oct-1                                        | Pou2f1 POU domain, class 2, transcription factor 1<br>POU= Pit-Oct-Unc<br>CAGTAGAATATTCTA                                | -670  | (-) | 0.992  |
| Oct-1                                        | Pou2f1 POU domain, class 2, transcription factor 1<br>POU= Pit-Oct-Unc<br>TAGAATATTCTAAAT                                | -667  | (+) | 0.992  |
| LEF1,TCF1                                    | Lymphoid enhancer-binding factor 1<br>T-cell-specific transcription factor 1<br>TGCATCAAAGA                              | -628  | (-) | 1.000  |
| Sox                                          | SRY-related HMG boxes<br>(A/T)AACAA(T/A)                                                                                 | -625  | (+) | manual |
| PLZF                                         | Promyelocytic leukemia zinc finger<br>TTCTTGCCAACCTAAATTTCTTTTTTTTT                                                      | -607  | (+) | 0.979  |
| AIRE                                         | Autoimmune regulator<br>TTTTTTTAATGGTTAACTCCAGAC                                                                         | -581  | (+) | 0.877  |
| OG-2                                         | Nobox OG-2 Homeobox protein NOBOX<br>TAATTG                                                                              | -575  | (+) | 1.000  |

|               |                                                                                                           |      |     |        |
|---------------|-----------------------------------------------------------------------------------------------------------|------|-----|--------|
| Hand1:E47     | E12/E47 basic helix-loophelix transcription factor<br>(the E2A gene product)<br>AACTCCAGACA ACTAT         | -566 | (-) | 1.000  |
| Tal-1beta:E47 | E12/E47 basic helix-loophelix transcription factor<br>(the E2A gene product)<br>TTCAACATCTGGTCTA          | -494 | (-) | 1.000  |
| Sox           | SRY-related HMG boxes<br>(A/T)AACAA(T/A)                                                                  | -463 | (+) | manual |
| GATA-1        | GATA binding Factor 1<br>AGATAA                                                                           | -450 | (+) | manual |
| Kid-3         | Kidney, ischemia, and developmentally-regulated<br>protein 3 = Zinc finger protein 354c and AJ18<br>GGTGG | -412 | (-) | 1.000  |
| Kid-3         | Kidney, ischemia, and developmentally-regulated<br>protein 3 = Zinc finger protein 354c and AJ18<br>GGTGG | -407 | (-) | 1.000  |
| CACD          | Central Alveolar Choroidal dystrophy<br>GGGTGTGG                                                          | -403 | (-) | 1.000  |
| Pax-4         | Paired box protein<br>GGTGTGGTGGTGGTAGAAGATTTCTTTTAC                                                      | -402 | (-) | 0.879  |
| Kid-3         | Kidney, ischemia, and developmentally-regulated<br>protein 3 = Zinc finger protein 354c and AJ18<br>GGTGG | -397 | (-) | 1.000  |
| Kid-3         | Kidney, ischemia, and developmentally-regulated<br>protein 3 = Zinc finger protein 354c and AJ18<br>GGTGG | -394 | (-) | 1.000  |
| CDP CR3       | CCAT Displacement Protein = Cux1<br>CAATAAACATGAGGG                                                       | -370 | (-) | 0.996  |
| HFH1(FOXQ1)   | HNF-3/Forkhead homolog 1<br>AGATAAACATTT                                                                  | -311 | (-) | 1.000  |
| GATA-1        | GATA binding Factor 1<br>AGATAA                                                                           | -310 | (+) | manual |
| FAC1          | Embryonic Factor 1 (human): Bromodomain PHD finger<br>transcription factor<br>TCACAAAACAGATA              | -298 | (+) | 0.978  |
| GATA-1        | GATA binding Factor 1<br>AGATAA                                                                           | -289 | (+) | manual |
| vMyb          | Myb proto-oncogene protein<br>ACCGTTTAC                                                                   | -270 | (-) | 1.000  |
| OSE2          | Osteoblast Specific Element 2<br>CACCAA                                                                   | -244 | (+) | manual |
| Sox           | SRY-related HMG boxes<br>(A/T)AACAA(T/A)                                                                  | -228 | (+) | manual |
| IPF1          | Insulin Promoter Factor<br>Synonym Pdx1Pancreatic Duedenal homebox 1<br>AAAATAATGAGA                      | -146 | (+) | 1.000  |
| Gli1          | Glioma-associated oncogene homolog<br>GAGCCTGCA                                                           | -136 | (+) | manual |

|         |                                                                                                           |      |     |        |
|---------|-----------------------------------------------------------------------------------------------------------|------|-----|--------|
| CDP CR3 | CCAT Displacement Protein = Cux1<br>CAATACAAGGGTGTG                                                       | -108 | (-) | 0.996  |
| Msx     | Homeobox protein MSX-1 (Msh homeobox 1-like protein)<br>(Hox-7) (Hox-7.1)<br>ATAATTG(G/C)                 | -91  | (+) | manual |
| OG-2    | Nobox OG-2 Homeobox protein NOBOX<br>TAATTG                                                               | -90  | (+) | 1.000  |
| LEF1    | Lymphoid enhancer-binding factor 1<br>CACTTTGATT                                                          | -53  | (-) | 1.000  |
| Kid-3   | Kidney, ischemia, and developmentally-regulated<br>protein 3 = Zinc finger protein 354c and AJ18<br>GGTGG | -43  | (-) | 1.000  |
